# Supplementary material
Source: publisher site journal article supplement (https://www.dovepress.com/get_supplementary_file.php?f=440802.docx)
Supplement: Supplementary file 1 [file get_supplementary_file.php]

**Supplementary Table 1 Diagnostic Codes for Cardiovascular Events and Predefined Risk Factors**

| ICD-10-CM Diagnosis Codes | Description |
| --- | --- |
| Predefined Risk Factors |  |
| Cardiovascular disease |  |
| I60 | Nontraumatic subarachnoid hemorrhage |
| I61 | Nontraumatic intracerebral hemorrhage |
| I63 | Cerebral infarction |
| I65 | Occlusion and stenosis of precerebral intracranial hemorrhage |
| I66 | Occlusion and stenosis of cerebral arteries, not resulting in cerebral infarction |
| I67 | Other cerebrovascular diseases |
| I68 | Cerebrovascular disorders in diseases classified elsewhere |
| I69 | Sequelae of cerebrovascular disease |
| Z86.73 | Personal history of transient ischemic attack (TIA), and cerebral infarction without residual deficits |
|  |  |
| History of myocardial infarction |  |
| I21 | Acute myocardial infarction |
| I22 | Subsequent ST elevation (STEMI) and non-ST elevation (NSTEMI) myocardial infarction |
| I25.2 | Old myocardial infarction |
| I25.6 | Silent myocardial ischemia |
| I46 | Cardiac arrest |
| Z86.74 | Personal history of sudden cardiac arrest |
|  |  |
| Cardiomyopathy |  |
| I25.5 | Ischemic cardiomyopathy |
| I42 | Cardiomyopathy |
| I43 | Cardiomyopathy in diseases classified elsewhere |
|  |  |
| Coronary artery disease |  |
| I25.1 | Atherosclerotic heart disease of native coronary artery |
|  |  |
| Atherothrombotic disease |  |
| I26 | Pulmonary embolism |
| I74 | Arterial embolism and thrombosis |
| I75 | Atheroembolism |
| I76 | Septic arterial embolism |
| I81 | Portal vein thrombosis |
| I82 | Other venous embolism and thrombosis |
| Z86.71 | Personal history of venous thrombosis and embolism |
|  |  |
| Peripheral arterial disease |  |
| I73 | Other peripheral vascular diseases |
|  |  |
| Hypertension |  |
| I10 | Essential (primary) hypertension |
| I11 | Hypertensive heart disease |
| I12 | Hypertensive chronic kidney disease |
| I13 | Hypertensive heart and chronic kidney disease |
| I15 | Secondary hypertension |
|  |  |
| Dyslipidemia |  |
| E78.0 | Pure hypercholesterolemia |
| E78.2 | Mixed hyperlipidemia |
| E78.4 | Other hyperlipidemia |
| E78.5 | Hyperlipidemia, unspecified |
|  |  |
| Diabetes mellitus |  |
| E08 | Diabetes mellitus due to underlying condition |
| E09 | Drug or chemical induced diabetes mellitus |
| E10 | Type 1 diabetes mellitus |
| E11 | Type 2 diabetes mellitus |
| E13 | Other specified diabetes mellitus |
|  |  |
| History of tobacco use |  |
| F17 | Nicotine dependence |
| Z72.0 | Tobacco use |
| T65.2 | Toxic effect of tobacco and nicotine |
|  |  |
| History of rheumatoid arthritis, psoriatic arthritis or ankylosing spondylitis |  |
| M05 | Rheumatoid arthritis with rheumatoid factor |
| M06 | Other rheumatoid arthritis |
| M45 | Ankylosing spondylitis |
| L40.5 | Arthropathic psoriasis |
|  |  |
| Chronic obstructive pulmonary disease (COPD) |  |
| J44.9 | COPD, unspecified |
|  |  |
| Obstructive sleep apnea |  |
| G47.33 | Obstructive sleep apnea |
|  |  |
| Chronic kidney disease |  |
| N18 | Chronic kidney disease (CKD) |
|  |  |
| Liver dysfunction |  |
| K70.0 | Alcoholic fatty liver disease |
| K70.1 | Alcoholic hepatitis |
| K70.2 | Alcoholic fibrosis and sclerosis of the liver |
| K70.3 | Alcoholic cirrhosis of the liver |
| K70.9 | Alcoholic liver disease, unspecified |
| K71.3 | Toxic liver disease with chronic persistent hepatitis |
| K71.4 | Toxic liver disease with chronic lobular hepatitis |
| K71.5 | Toxic liver disease with chronic active hepatitis |
| K71.6 | Toxic liver disease with hepatitis, not elsewhere classified |
| K71.7 | Toxic liver disease with fibrosis and cirrhosis of liver |
| K73.0 | Chronic persistent hepatitis, not elsewhere classified |
| K73.1 | Chronic lobular hepatitis, not elsewhere classified |
| K73.2 | Chronic active hepatitis, not elsewhere classified |
| K73.8 | Other chronic hepatitis, not elsewhere classified |
| K73.9 | Chronic hepatitis, unspecified |
| K74.0 | Hepatic fibrosis |
| K74.00 | Fibrosis unspecified |
| K74.01 | Early fibrosis |
| K74.02 | Advanced fibrosis |
| K74.1 | Hepatic sclerosis |
| K74.2 | Hepatic fibrosis with hepatic sclerosis |
| K74.6 | Other and unspecified cirrhosis of liver |
| K74.60 | Unspecified cirrhosis of liver |
| K74.69 | Other cirrhosis of liver |
| K75.81 | NASH |

ICD-10-CM; International Classification of Disease, 10th Revision, Clinical Modification; non-alcoholic hepatic steatosis =NASH; chronic kidney disease = CKD; chronic obstructive pulmonary disease = COPD; ST elevated myocardial infarction = STEMI; non- ST elevated myocardial infarction = NSTEMI; transient ischemic attack = TIA

|  | **Supplementary Table 2 Secondary Outcomes: Myocardial Infarction**   | Covariates | Cardiovascular Event =  Myocardial Infarction | | | | | --- | --- | --- | --- | --- | | (Cases, n = 61,717;  Controls, n = 617,170) | | | | | Odds Ratio | 95% CI | | P Value | | **DEMOGRAPHICS** |  |  |  |  | | Age Group (years) |  |  |  |  | | 18-34 (reference) |  |  |  |  | | 35-44 | 2.37 | 2.22 | 2.53 | <0.001 | | 45-54 | 4.89 | 4.61 | 5.18 | <0.001 | | 55-64 | 7.25 | 6.86 | 7.67 | <0.001 | | 65-74 | 7.54 | 7.13 | 7.98 | <0.001 | | 75+ | 10.59 | 9.98 | 11.24 | <0.001 | | Male | 1.55 | 1.49 | 1.61 | <0.001 | | Race |  |  |  |  | | Black or African American | 0.93 | 0.90 | 0.95 | <0.001 | | Other | 1.19 | 1.16 | 1.23 |  | | White (reference) |  |  |  | <0.001 | | **PREDEFINED RISK FACTORS** |  |  |  |  | | Diabetes | 1.23 | 1.21 | 1.26 | <0.001 | | Hypertension | 1.44 | 1.41 | 1.48 | <0.001 | | Dyslipidemia | 0.97 | 0.95 | 0.99 | 0.0029 | | History of Myocardial Infarction | 4.27 | 4.05 | 4.49 | <0.001 | | Arthritis or Spondylitis | 1.18 | 1.11 | 1.25 | <0.001 | | Peripheral Arterial Disease | 1.37 | 1.31 | 1.42 | <0.001 | | Chronic Kidney Disease | 1.53 | 1.48 | 1.59 | <0.001 | | History of Heart Failure | 1.51 | 1.44 | 1.58 | <0.001 | | Atherothrombotic Disease | 1.59 | 1.50 | 1.69 | <0.001 | | History of Tobacco Use (Dx Only) | 1.52 | 1.47 | 1.56 | <0.001 | | Cerebrovascular Disease | 1.55 | 1.49 | 1.62 | <0.001 | | Coronary Artery Disease | 2.53 | 2.47 | 2.60 | <0.001 | | Cardiomyopathy | 1.74 | 1.64 | 1.84 | <0.001 | | Aspirin Use | 1.79 | 1.74 | 1.83 | <0.001 | | Other Anticoagulant Use | 2.36 | 2.28 | 2.44 | <0.001 | | Obstructive Sleep Apnea | 0.92 | 0.90 | 0.94 | <0.001 | | Liver Dysfunction | 1.41 | 1.33 | 1.50 | <0.001 | | COPD | 1.46 | 1.42 | 1.51 | <0.001 | | **PRESCRIPTION DRUG INFORMATION** |  |  |  |  | | BY SELECTIVITY |  |  |  |  | | COX 1 | 1.07 | 1.02 | 1.12 | 0.00449 | | COX 2 | 1.10 | 1.05 | 1.15 | <0.001 | | Non-Selective | 1.10 | 1.05 | 1.16 | <0.001 | | BY DOSE CATEGORY |  |  |  |  | | Low/Medium Dose | 1.05 | 0.98 | 1.12 | 0.15442 | | High Dose | 0.99 | 0.92 | 1.05 | 0.64619 | | TIME SINCE INITIAL EXPOSURE (DAYS) |  |  |  |  | | No Exposure (reference) |  |  |  |  | | LEQ 30 | 8.95 | 8.20 | 9.78 | <0.001 | | 31-90 | 10.29 | 9.47 | 11.20 | <0.001 | | 91-180 | 9.38 | 8.63 | 10.21 | <0.001 | | 181-365 | 8.84 | 8.13 | 9.61 | <0.001 | | 366-730 | 8.13 | 7.48 | 8.84 | <0.001 | | 731+ | 6.56 | 6.02 | 7.15 | <0.001 | |  |
| --- | --- | --- | --- | --- | --- | --- | --- | --- | --- | --- | --- | --- | --- | --- | --- | --- | --- | --- | --- | --- | --- | --- | --- | --- | --- | --- | --- | --- | --- | --- | --- | --- | --- | --- | --- | --- | --- | --- | --- | --- | --- | --- | --- | --- | --- | --- | --- | --- | --- | --- | --- | --- | --- | --- | --- | --- | --- | --- | --- | --- | --- | --- | --- | --- | --- | --- | --- | --- | --- | --- | --- | --- | --- | --- | --- | --- | --- | --- | --- | --- | --- | --- | --- | --- | --- | --- | --- | --- | --- | --- | --- | --- | --- | --- | --- | --- | --- | --- | --- | --- | --- | --- | --- | --- | --- | --- | --- | --- | --- | --- | --- | --- | --- | --- | --- | --- | --- | --- | --- | --- | --- | --- | --- | --- | --- | --- | --- | --- | --- | --- | --- | --- | --- | --- | --- | --- | --- | --- | --- | --- | --- | --- | --- | --- | --- | --- | --- | --- | --- | --- | --- | --- | --- | --- | --- | --- | --- | --- | --- | --- | --- | --- | --- | --- | --- | --- | --- | --- | --- | --- | --- | --- | --- | --- | --- | --- | --- | --- | --- | --- | --- | --- | --- | --- | --- | --- | --- | --- | --- | --- | --- | --- | --- | --- | --- | --- | --- | --- | --- | --- | --- | --- | --- | --- | --- | --- | --- | --- | --- | --- | --- | --- | --- | --- | --- | --- | --- | --- | --- | --- | --- | --- | --- | --- | --- | --- | --- | --- | --- | --- | --- | --- | --- | --- | --- | --- | --- | --- | --- | --- | --- | --- | --- | --- | --- | --- | --- | --- | --- | --- | --- | --- | --- | --- | --- |
|  |  |
|  |  |

**Supplementary Table 3 Secondary Outcomes: New Heart Failure**

| Covariates | Cardiovascular Event = New Heart Failure | | | |
| --- | --- | --- | --- | --- |
| (Cases, n = 94,065; Controls, n = 940,650) | | | |
| Odds Ratio | 95% CI | | P Value |
| **DEMOGRAPHICS** |  |  |  |  |
| Age Group (years) |  |  |  |  |
| 18-34 (reference) |  |  |  |  |
| 35-44 | 2.78 | 2.57 | 3.01 | <0.001 |
| 45-54 | 6.49 | 6.05 | 6.96 | <0.001 |
| 55-64 | 12.43 | 11.63 | 13.31 | <0.001 |
| 65-74 | 18.18 | 17.01 | 19.45 | <0.001 |
| 75+ | 35.13 | 32.82 | 37.65 | <0.001 |
| Male | 1.12 | 1.09 | 1.16 | <0.001 |
| Race |  |  |  |  |
| Black or African American | 1.08 | 1.06 | 1.10 | <0.001 |
| Other | 1.17 | 1.15 | 1.20 | <0.001 |
| White (reference) |  |  |  |  |
| **PREDEFINED RISK FACTORS** |  |  |  |  |
| Diabetes | 1.49 | 1.46 | 1.51 | <0.001 |
| Hypertension | 1.76 | 1.72 | 1.79 | <0.001 |
| Dyslipidemia | 0.85 | 0.83 | 0.86 | <0.001 |
| History of Myocardial Infarction | 1.50 | 1.42 | 1.58 | <0.001 |
| Arthritis or Spondylitis | 1.37 | 1.31 | 1.44 | <0.001 |
| Peripheral Arterial Disease | 1.44 | 1.39 | 1.49 | <0.001 |
| Chronic Kidney Disease | 1.69 | 1.64 | 1.74 | <0.001 |
| History of Heart Failure (Only 10 cases) | 0.00 | 0.00 | 0.00 | - |
| Atherothrombotic Disease | 1.65 | 1.58 | 1.73 | <0.001 |
| History of Tobacco Use (Dx Only) | 1.31 | 1.28 | 1.34 | <0.001 |
| Cerebrovascular Disease | 1.56 | 1.50 | 1.61 | <0.001 |
| Coronary Artery Disease | 2.20 | 2.15 | 2.24 | <0.001 |
| Cardiomyopathy | 9.37 | 8.95 | 9.82 | <0.001 |
| Aspirin Use | 1.54 | 1.51 | 1.57 | <0.001 |
| Other Anticoagulant Use | 3.52 | 3.43 | 3.61 | <0.001 |
| Obstructive Sleep Apnea | 1.32 | 1.30 | 1.35 | <0.001 |
| Liver Dysfunction | 1.69 | 1.61 | 1.77 | <0.001 |
| COPD | 2.20 | 2.15 | 2.25 | <0.001 |
| **PRESCRIPTION DRUG INFORMATION** |  |  |  |  |
| BY SELECTIVITY |  |  |  |  |
| COX 1 | 1.04 | 1.00 | 1.08 | 0.0399 |
| COX 2 | 1.08 | 1.04 | 1.13 | <0.001 |
| Non-Selective | 1.07 | 1.03 | 1.12 | <0.001 |
| BY DOSE CATEGORY |  |  |  |  |
| Low/Medium Dose | 1.08 | 1.02 | 1.14 | 0.00785 |
| High Dose | 1.06 | 1.01 | 1.12 | 0.01937 |
| TIME SINCE INITIAL EXPOSURE (DAYS) |  |  |  |  |
| No Exposure (reference) |  |  |  |  |
| LEQ 30 | 9.14 | 8.49 | 9.84 | <0.001 |
| 31-90 | 9.56 | 8.91 | 10.27 | <0.001 |
| 91-180 | 8.65 | 8.06 | 9.28 | <0.001 |
| 181-365 | 7.88 | 7.35 | 8.46 | <0.001 |
| 366-730 | 6.98 | 6.50 | 7.49 | <0.001 |
| 731+ | 5.80 | 5.39 | 6.23 | <0.001 |

**Supplementary Table 4 Secondary Outcomes: Nonfatal Stroke**

| Covariates | Cardiovascular Event =  Nonfatal Stroke | | | |
| --- | --- | --- | --- | --- |
| (Cases, n = 81,050;  Controls, n = 810,500) | | | |
| Odds Ratio | 95% CI | | P Value |
| **DEMOGRAPHICS** |  |  |  |  |
| Age Group (years) |  |  |  |  |
| 18-34 (reference) |  |  |  |  |
| 35-44 | 2.65 | 2.48 | 2.83 | <0.001 |
| 45-54 | 5.72 | 5.40 | 6.07 | <0.001 |
| 55-64 | 9.94 | 9.40 | 10.52 | <0.001 |
| 65-74 | 12.87 | 12.17 | 13.62 | <0.001 |
| 75+ | 21.09 | 19.89 | 22.38 | <0.001 |
| Male (dropped from final model) |  |  |  | - |
| Race |  |  |  |  |
| Black or African American | 1.21 | 1.19 | 1.24 | <0.001 |
| Other | 1.16 | 1.13 | 1.19 | <0.001 |
| White (reference) |  |  |  |  |
| **PREDEFINED RISK FACTORS** |  |  |  |  |
| Diabetes | 1.30 | 1.27 | 1.32 | <0.001 |
| Hypertension | 1.47 | 1.44 | 1.51 | <0.001 |
| Dyslipidemia | 0.92 | 0.90 | 0.94 | <0.001 |
| History of Myocardial Infarction | 1.37 | 1.28 | 1.45 | <0.001 |
| Arthritis or Spondylitis | 1.12 | 1.06 | 1.18 | <0.001 |
| Peripheral Arterial Disease | 1.16 | 1.12 | 1.21 | <0.001 |
| Chronic Kidney Disease | 1.28 | 1.24 | 1.32 | <0.001 |
| History of Heart Failure | 1.19 | 1.14 | 1.26 | <0.001 |
| Atherothrombotic Disease | 1.48 | 1.40 | 1.56 | <0.001 |
| History of Tobacco Use (Dx Only) | 1.38 | 1.34 | 1.41 | <0.001 |
| Cerebrovascular Disease | 15.57 | 15.17 | 15.97 | <0.001 |
| Coronary Artery Disease | 1.12 | 1.09 | 1.15 | <0.001 |
| Cardiomyopathy | 1.27 | 1.20 | 1.35 | <0.001 |
| Aspirin Use | 1.82 | 1.78 | 1.86 | <0.001 |
| Other Anticoagulant Use | 1.98 | 1.92 | 2.05 | <0.001 |
| Obstructive Sleep Apnea | 0.93 | 0.91 | 0.95 | <0.001 |
| Liver Dysfunction | 1.14 | 1.07 | 1.21 | <0.001 |
| COPD | 1.22 | 1.19 | 1.26 | <0.001 |
| **PRESCRIPTION DRUG INFORMATION** |  |  |  |  |
| BY SELECTIVITY |  |  |  |  |
| COX 1 | 0.98 | 0.94 | 1.02 | 0.31883 |
| COX 2 | 1.09 | 1.04 | 1.14 | <0.001 |
| Non-Selective | 1.05 | 1.00 | 1.09 | 0.03353 |
| BY DOSE CATEGORY |  |  |  |  |
| Low/Medium Dose | 1.05 | 0.99 | 1.12 | 0.1097 |
| High Dose | 0.97 | 0.91 | 1.03 | 0.25744 |
| TIME SINCE INITIAL EXPOSURE (DAYS) |  |  |  |  |
| No Exposure (reference) |  |  |  |  |
| LEQ 30 | 8.52 | 7.91 | 9.19 | <0.001 |
| 31-90 | 8.97 | 8.35 | 9.65 | <0.001 |
| 91-180 | 8.36 | 7.78 | 8.99 | <0.001 |
| 181-365 | 7.87 | 7.33 | 8.46 | <0.001 |
| 366-730 | 7.08 | 6.58 | 7.61 | <0.001 |
| 731+ | 5.73 | 5.32 | 6.17 | <0.001 |

**Supplementary Table 5 NSAID Analysis of Dose Impact on Risk Factors**

| Covariates | All Patients | | | |
| --- | --- | --- | --- | --- |
| (Cases, n = 231,967; Controls, n = 2,319,670) | | | |
| Odds Ratio | 95% CI | | P Value |
| **DEMOGRAPHICS** |  |  |  |  |
| Age Group (years) |  |  |  |  |
| 18-34 (reference) |  |  |  |  |
| 35-44 | 2.58 | 2.48 | 2.68 | <0.001 |
| 45-54 | 5.64 | 5.44 | 5.85 | <0.001 |
| 55-64 | 9.62 | 9.30 | 9.96 | <0.001 |
| 65-74 | 12.22 | 11.81 | 12.65 | <0.001 |
| 75+ | 19.81 | 19.12 | 20.53 | <0.001 |
| Male | 1.18 | 1.16 | 1.20 | <0.001 |
| Race |  |  |  |  |
| Black or African American | 1.08 | 1.07 | 1.10 | <0.001 |
| Other | 1.14 | 1.12 | 1.15 | <0.001 |
| White (reference) |  |  |  |  |
| **PREDEFINED RISK FACTORS** |  |  |  |  |
| Diabetes | 1.33 | 1.32 | 1.35 | <0.001 |
| Hypertension | 1.56 | 1.54 | 1.58 | <0.001 |
| Dyslipidemia | 0.91 | 0.90 | 0.92 | <0.001 |
| History of Myocardial Infarction | 2.07 | 2.01 | 2.13 | <0.001 |
| Arthritis or Spondylitis | 1.22 | 1.19 | 1.26 | <0.001 |
| Peripheral Arterial Disease | 1.23 | 1.21 | 1.26 | <0.001 |
| Chronic Kidney Disease | 1.41 | 1.39 | 1.44 | <0.001 |
| Atherothrombotic Disease | 1.55 | 1.51 | 1.60 | <0.001 |
| History of Tobacco Use (Dx Only) | 1.37 | 1.35 | 1.40 | <0.001 |
| Cerebrovascular Disease | 5.04 | 4.96 | 5.13 | <0.001 |
| Coronary Artery Disease | 1.77 | 1.75 | 1.80 | <0.001 |
| Cardiomyopathy | 2.70 | 2.63 | 2.78 | <0.001 |
| Aspirin Use | 1.72 | 1.69 | 1.74 | <0.001 |
| Other Anticoagulant Use | 2.58 | 2.54 | 2.62 | <0.001 |
| Obstructive Sleep Apnea | 1.06 | 1.05 | 1.07 |  |
| Liver Dysfunction | 1.40 | 1.36 | 1.45 | <0.001 |
| COPD | 1.61 | 1.59 | 1.63 | <0.001 |
| **PRESCRIPTION DRUG INFORMATION** |  |  |  |  |
| BY ACTIVE INGREDIENT AND DOSE |  |  |  |  |
| Celecoxib / Low Med | 1.05 | 1.02 | 1.07 | <0.001 |
| Diclofenac / Low Med | 1.13 | 1.11 | 1.16 | <0.001 |
| Etodolac / Low Med | 1.12 | 1.08 | 1.15 | <0.001 |
| Ibuprofen / Low Med | 1.02 | 1.00 | 1.04 | 0.02 |
| Indomethacin / Low Med | 1.14 | 1.10 | 1.17 | <0.001 |
| Meloxicam / Low Med | 1.13 | 1.10 | 1.15 | <0.001 |
| Meloxicam / High | 1.06 | 1.04 | 1.08 | <0.001 |
| Naproxen / Low Med | 1.08 | 1.06 | 1.10 | <0.001 |
| Other | 1.19 | 1.14 | 1.23 | <0.001 |
| TIME SINCE INITIAL EXPOSURE (DAYS) |  |  |  |  |
| No Exposure (reference) |  |  |  |  |
| LEQ 30 | 9.37 | 9.03 | 9.72 | <0.001 |
| 31-90 | 9.97 | 9.63 | 10.32 | <0.001 |
| 91-180 | 9.08 | 8.77 | 9.40 | <0.001 |
| 181-365 | 8.37 | 8.09 | 8.66 | <0.001 |
| 366-730 | 7.45 | 7.20 | 7.71 | <0.001 |
| 731+ | 6.04 | 5.83 | 6.26 | <0.001 |
